# Supplementary material for: Symbiodinium spp. associated with scleractinian corals from Dongsha Atoll (Pratas), Taiwan, in the South China Sea
Source: PeerJ. 2017 Jan 18;5:e2871. doi: 10.7717/peerj.2871 (PMC5248580; doi:10.7717/peerj.2871)
Supplement: Data S1 [file peerj-05-2871-s002.xlsx]

## Sheet: Temperature Data analysis
Temperature over 30℃ time	2009		2010												Location	0 ~ 1	1 ~ 2	2 ~ 3	3 ~ 4	over 5	Unit ℃
Reef 1 Top			0.681					2009			2010				2009
Reef 1 Base	0.073		0.623				Location	Reef 5	Reef 6	Reef 9	Reef 1	Reef 4	Reef 9		Reef 1 Base	82 (90.1%)	8 (8.8%)	1 (1.1%)
Reef 2 Base	0.032						ΔT value	0.69 ± 0.35°C	0.8 ± 0.58°C	0.37 ± 0.38°C	0.28 ± 0.13°C	0.12 ± 0.11°C	0.27 ± 0.29°C		Reef 2 Base	87 (95.6%)	3 (3.3%)	1 (1.1%)
Reef 4 Top			0.655				Reef Top daily max T	29.9°C	30°C	29.2°C	28.9°C	27.3°C	31.3°C		Reef 5 Top	62 (68.1%)	27 (29.7%)	1 (1.1%)	1 (1.1%)
Reef 4 Base			0.643				Reef Base daily max T	27.4°C	26.3°C	26.3°C	26.3°C	25.5°C	29.1°C		Reef 5 Base	82 (90.1%)	6 (6.6%)	2 (2.2%)	1 (1.1%)
Reef 5 Top	0.239						max ΔT	2.5°C	3.7°C	2.9°C	1.2°C	1.8°C	2.2°C		Reef 6 Top	71 (78%)	18 (19.8%)	2 (2.2%)
Reef 5 Base	0.104							Average ΔT = 0.62 ± 0.3°C			Average ΔT = 0.22 ± 0.14°C				Reef 6 Base	81 (89%)	7 (7.7%)	2 (2.2%)	1 (1.1%)
Reef 6 Top	0.527						Reef Top - Reef Base = ΔT ± SD								Reef 9 Top	62 (68.1%)	21 (23.1%)	5 (5.5%)	3 (3.3%)
Reef 6 Base	0.194														Reef 9 Base	73 (80.2%)	13 (14.3%)	4 (4.4%)	1 (1.1%)
Reef 9 Top	0.312		0.488												Total percentage	0.824	0.141	0.025	0.01
Reef 9 Base	0.236		0.398												2010
Reef Top over 30℃ time	0.359		0.608												Reef 1 Top	86 (84.3%)	16 (15.7%)
Reef Base over 30℃ time	0.128		0.555												Reef 1 Base	94 (92.2%)	8 (7.8%)
															Reef 4 Top	99 (97.06%)		1 (0.98%)	1 (0.98%)	1 (0.98%)
															Reef 4 Base	97 (95.1%)	2 (1.96%)	1 (0.98%)	1 (0.98%)	1 (0.98%)
															Reef 9 Top	20 (19.6%)	66 (64.7%)	16 (15.7%)
															Reef 9 Base	61 (59.8%)	36 (35.3%)	5 (4.9%)
															Total percentage	0.747	0.209	0.038	0.003	0.003
